# Supplementary material
Source: Springer Nature journal article supplement (https://www.springermedizin.de/resource/supplementary/13058_2009_2432_MOESM8_ESM.pdf/9701396)

**ER status endpoint (by FS)**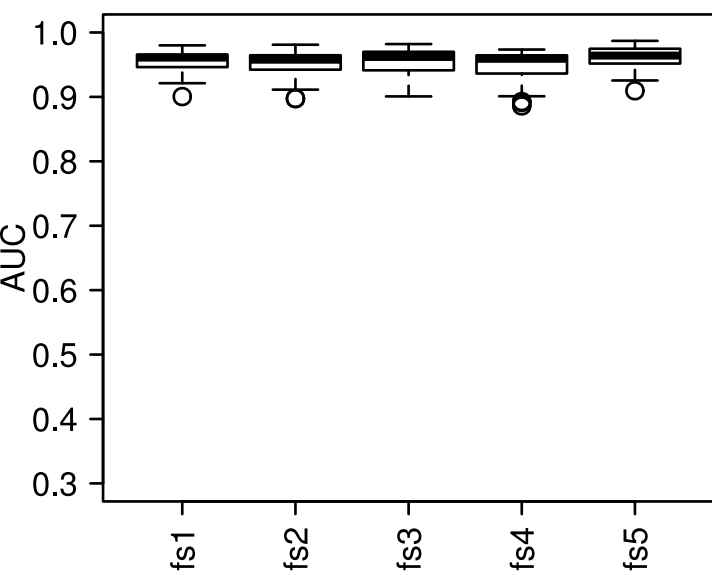**ER status endpoint (by classifier)**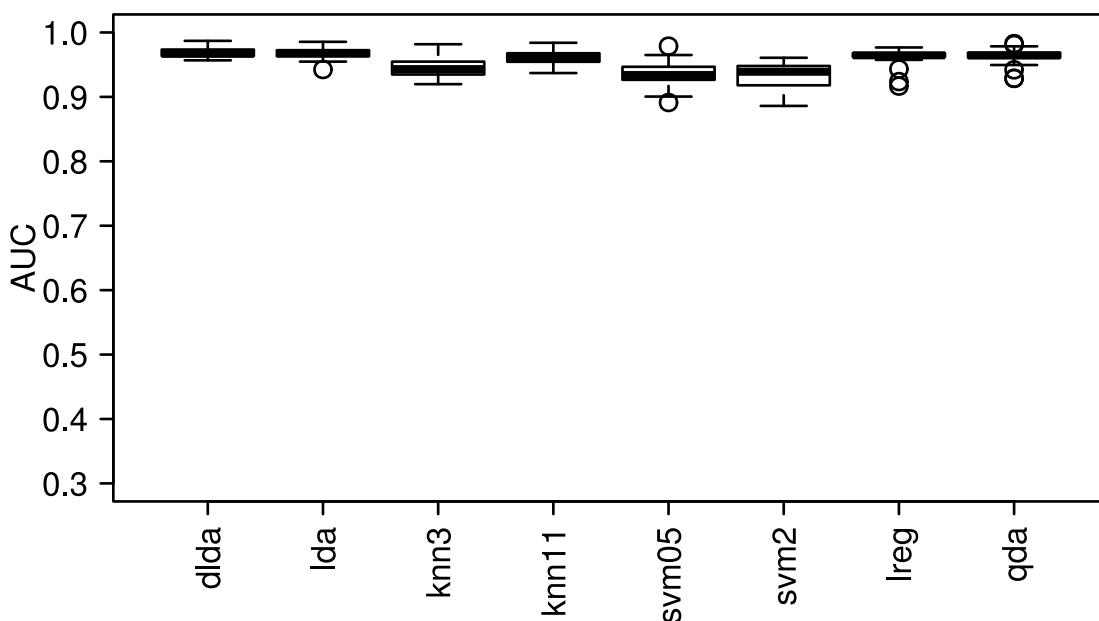**pCR endpoint (by FS)**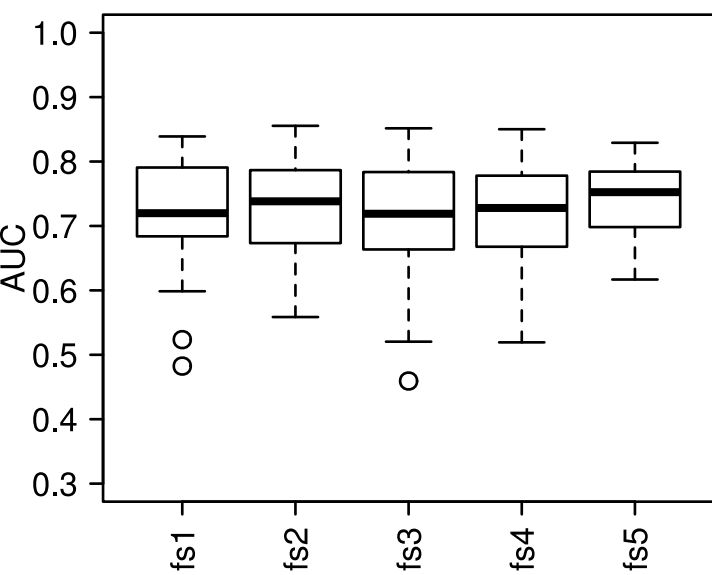**pCR endpoint (by classifier)**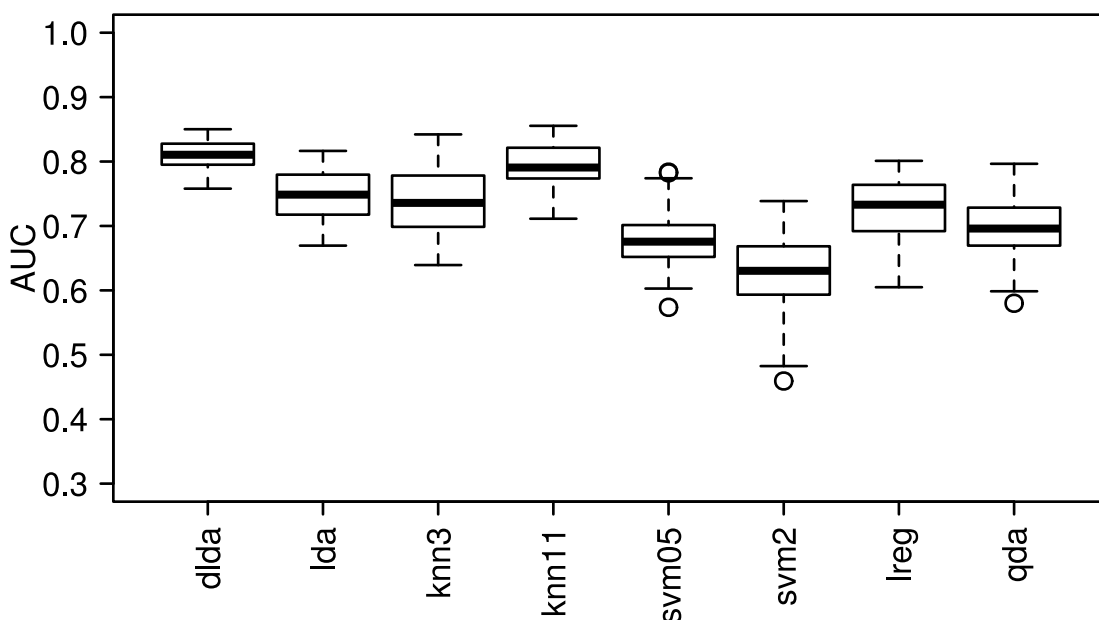**pCR(ER-) endpoint (by FS)**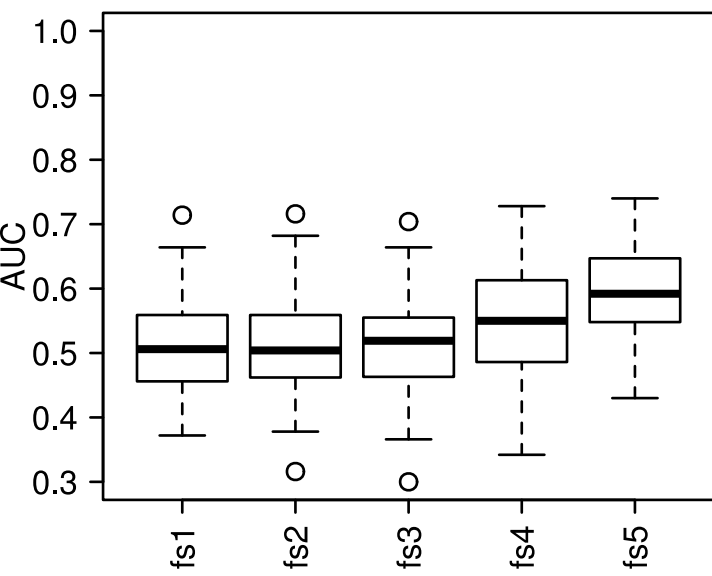**pCR(ER-) endpoint (by classifier)**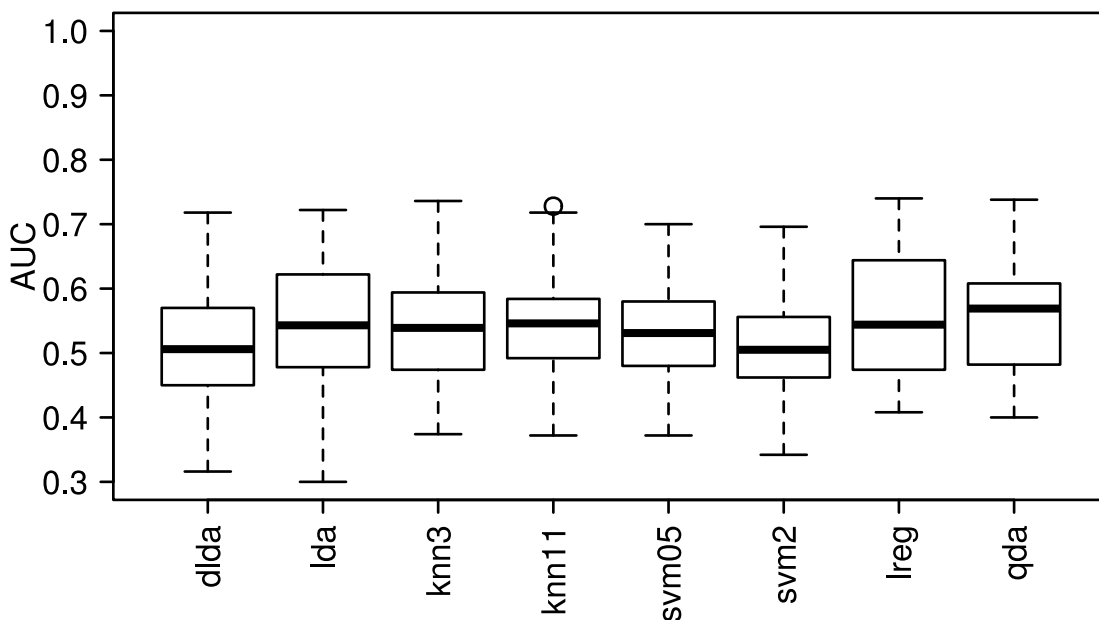

Supplement: MOESM8 [file 9701396]
